# Supplementary material for: Clinical Aureobasidium Isolates Are More Fungicide Sensitive than Many Agricultural Isolates
Source: PubMed Central journal article supplement (PMC10100788; doi:10.1128/spectrum.05299-22), 2023-03-21
Supplement: spectrum.05299-22-s0001.pdf [file spectrum.05299-22-s0001.pdf]

**Supplementary Table 1.** All 46 *Aureobasidium* isolates that were used in this study. The MIC<sub>50</sub> values for captan (CAN), cyprodinil (CYP), and difenoconazole (DFN) are indicated. The reference isolates used for sequence comparison in the molecular analyses are also listed. Strain d450803 was excluded as an outlier because it had overall reduced growth even in absence of the fungicides.

| Nr. | Isolate      | MIC <sub>50</sub> [µg /ml] |                         |      | Sample                                                                              | Reference  |
|-----|--------------|----------------------------|-------------------------|------|-------------------------------------------------------------------------------------|------------|
|     |              | CAN                        | CYP                     | DFN  |                                                                                     |            |
|     | HUG.AP       | 2.1                        | 4.9                     | 0.28 | Cornea                                                                              | This study |
|     | IFIK 1931366 | 4.8                        | 10.3                    | 0.02 | Thumb nail                                                                          | This study |
|     | IFIK 1976364 | 1.3                        | 6.0                     | 3.25 | Dry skin from the foot                                                              | This study |
|     | IFIK 2015300 | 4.5                        | 5.2                     | 0.01 | Nail                                                                                | This study |
|     | IFIK 2049092 | 1.2                        | 10.3                    | 0.00 | Dry skin from the foot                                                              | This study |
|     | IFIK 2073347 | 2.6                        | 3.4                     | 0.68 | Dry skin from the foot                                                              | This study |
|     | IFIK 2230802 | 2.1                        | 6.6                     | 0.02 | Dry skin from the foot                                                              | This study |
|     | IFIK 2296290 | 2.1                        | 20.9                    | 2.93 | Dry skin from the foot                                                              | This study |
|     | d450803      | 2.1                        | 5.8                     | 7.69 | Thumb                                                                               | This study |
|     | CBS 101119   | 3.3                        | 5.0                     | 0.02 | Man BAL fluid, patient; Netherlands                                                 | CBS        |
|     | CBS 121327   | 5.4                        | 2.3                     | 0.35 | Ear canal of child; Greece                                                          | CBS        |
|     | CBS 121328   | 1.1                        | 0.7                     | 0.38 | Man onychomycosis; Greece                                                           | CBS        |
|     | CBS 298.56   | 4.4                        | 3.4                     | 0.00 | Man, lymph node; USA                                                                | CBS        |
|     | CBS 577.93   | 5.3                        | 31.3                    | 0.02 | Man bronchial-alveolar lavage, 3-year-old boy with chronic myeloid leukemia; Sweden | CBS        |
|     | CBS 626.85   | 4.7                        | 14.1                    | 0.01 | Man peritoneal dialysis fluid; Australia                                            | CBS        |
|     | CBS 699.76   | 3.2                        | 13.2                    | 0.07 | Man thumb nail; Netherlands                                                         | CBS        |
| 211 | F2           | 5.1                        | 2.8                     | 0.5  | Apple flower                                                                        | [8]        |
| 353 | Fr1          | 22.5                       | 9                       | 1    | Apple fruit                                                                         | [8]        |
| 423 | SFr4.3       | 25.1                       | 7.9                     | 2.4  | Apple fruit                                                                         | [8]        |
| 10  | LSK 2.11     | 19.7                       | 49.3                    | 1.8  | Apple leaf                                                                          | [8]        |
| 100 | FLSK 5.1     | 18.8                       | 7.5                     | 1.3  | Apple leaf                                                                          | [8]        |
| 9   | LSK 10.4     | 41                         | 18.9                    | 2.4  | Apple leaf                                                                          | [8]        |
| 7   | LCH 10.2     | 20.9                       | 34.1                    | 7.1  | Apple leaf                                                                          | [8]        |
| 8   | LCH 5.9      | 51.5                       | 11.9                    | 1.3  | Apple leaf                                                                          | [8]        |
| 199 | ChF4.2       | 6.3                        | 2.2                     | 0.9  | Apple flower                                                                        | [8]        |
| 6   | LCH 2.1      | 44.7                       | 29.7                    | 3.7  | Apple leaf                                                                          | [8]        |
| 198 | CaL1.1       | 19.1                       | 20.6                    | 1.1  | Apple leaf                                                                          | [8]        |
| 425 | CaFr2.1      | 19.4                       | 3.8                     | 1.2  | Apple fruit                                                                         | [8]        |
| 5   | LC 5.2       | 39.5                       | 186                     | 0.7  | Apple leaf                                                                          | [8]        |
|     | LC 1.9       | 38.4                       | 59.6                    | 5.2  | Apple leaf                                                                          | [8]        |
| 4   | LC 1.3       | 50.8                       | 50.5                    | 4.2  | Apple leaf                                                                          | [8]        |
|     | LF 3.10      | 20.6                       | 3.4                     | 4.8  | Apple leaf                                                                          | [8]        |
| 18  | LF 5.11      | 23.4                       | 14.1                    | 2.2  | Apple leaf                                                                          | [8]        |
| 393 | FFr4.3       | 19.9                       | 3.2                     | 3.1  | Apple fruit                                                                         | [8]        |
| 19  | LF 5.16      | 28.7                       | 42.8                    | 1.4  | Apple leaf                                                                          | [8]        |
| 30  | LF 5.10      | 54.4                       | 41.9                    | 10.1 | Apple leaf                                                                          | [8]        |
|     | AF4.1b       | 17                         | 8.9                     | 0.4  | Apple flower                                                                        | [8]        |
|     | AL4e         | 19.3                       | 1.45 x 10 <sup>39</sup> | 2.2  | Apple leaf                                                                          | [8]        |
|     | AF4.1a       | 5.8                        | 3.6                     | 0.6  | Apple flower                                                                        | [8]        |
|     | CnF4.2       | 5.3                        | 2                       | 0.6  | Apple flower                                                                        | [8]        |
|     | CnL4a        | 21.4                       | 6                       | 1.7  | Apple leaf                                                                          | [8]        |
|     | CnFr4.4      | 33.1                       | 9                       | 0.9  | Apple fruit                                                                         | [8]        |
|     | FL4.31       | 40.2                       | 8.3                     | 1    | Apple flower                                                                        | [8]        |
|     | FLF 4.3      | 5.7                        | 4.7                     | 1.4  | Apple flower                                                                        | [8]        |
|     | FLS4a        | 109.6                      | 6.6                     | 1.8  | Apple flower                                                                        | [8]        |
